# Supplementary material
Source: PubMed Central journal article supplement (PMC11138174)
Supplement: flgastro-2022-102309supp001.pdf [file flgastro-2022-102309supp001.pdf]

**Supplementary Table 1. Simple Endoscopic Score for Crohn's Disease (SES-CD)<sup>8</sup>**

| Variable          | SES-CD values      |                                         |                                    |                                      | Score per segment |           |            |                        |        | Total                 |
|-------------------|--------------------|-----------------------------------------|------------------------------------|--------------------------------------|-------------------|-----------|------------|------------------------|--------|-----------------------|
|                   | 0                  | 1                                       | 2                                  | 3                                    | Ileum             | Ascending | Transverse | Sigmoid/<br>descending | Rectum |                       |
| Ulcers            | None               | Aphthous ulcers<br>(Diameter 0.1-0.5cm) | Large ulcers<br>(Diameter 0.5-2cm) | Very large ulcers<br>(Diameter >2cm) |                   |           |            |                        |        |                       |
| Ulcerated surface | None               | <10%                                    | 10-30%                             | >30%                                 |                   |           |            |                        |        |                       |
| Affected surface  | Unaffected segment | <50%                                    | 50-75%                             | >75%                                 |                   |           |            |                        |        |                       |
| Stenosis          | None               | Single, can be passed                   | Multiple, can be passed            | Cannot be passed                     |                   |           |            |                        |        |                       |
| Total             |                    |                                         |                                    |                                      |                   |           |            |                        |        | = sum of all segments |

**Supplementary Table 2. Baseline and follow up parameters measured at endoscopy:****HBI, SES-CD, presence of ulceration**

| Parameter                       | At baseline endoscopy | At follow up endoscopy |
|---------------------------------|-----------------------|------------------------|
| HBI (median, IQR)               | 5 (2-8)               | 1 (0-5)                |
| Remission (<5), [n, %]          | 25 (50)               | 36 (72)                |
| Mild disease (5-7), [n, %]      | 11 (22)               | 11 (22)                |
| Moderate disease (8-16), [n, %] | 13 (26)               | 2 (4)                  |
| Severe disease (>16), [n, %]    | 1 (2)                 | 1 (2)                  |
| SES-CD (median, IQR)            | 11 (7.5-16.3)         | 2 (0.0-6.3)            |

|                                 |             |             |
|---------------------------------|-------------|-------------|
| Remission (0-2), [n, %]         | 0 (0)       | 25 (50)     |
| Mild disease (3-6), [n, %]      | 12 (24)     | 13 (26)     |
| Moderate disease (7-16), [n, %] | 26 (52)     | 9 (18)      |
| Severe disease (>16), [n, %]    | 12 (24)     | 3 (6)       |
| Ulcers [n, %]                   | 44/50 (88%) | 22/50 (44%) |

HBI – Harvey Bradshaw Index; SES-CD – Simple Endoscopic Score for Crohn’s Disease; IQR - interquartile range.

**Supplementary Figure 1.** Correlation between HBI and SES-CD at baseline (a) and follow-up endoscopy (b)

a)  $r=0.14$  [-0.15 to 0.41],  $p=0.33$ ;

b)  $r=0.20$  [-0.09 to 0.46],  $p=0.16$

SES-CD – Simple Endoscopic Score for Crohn’s Disease; HBI – Harvey Bradshaw Index;  $r$  = Spearman correlation
