# Supplementary material
Source: PubMed Central journal article supplement (PMC11138174)

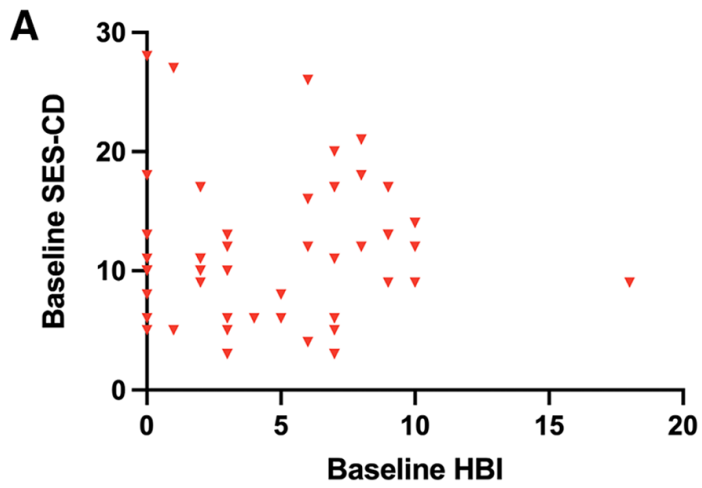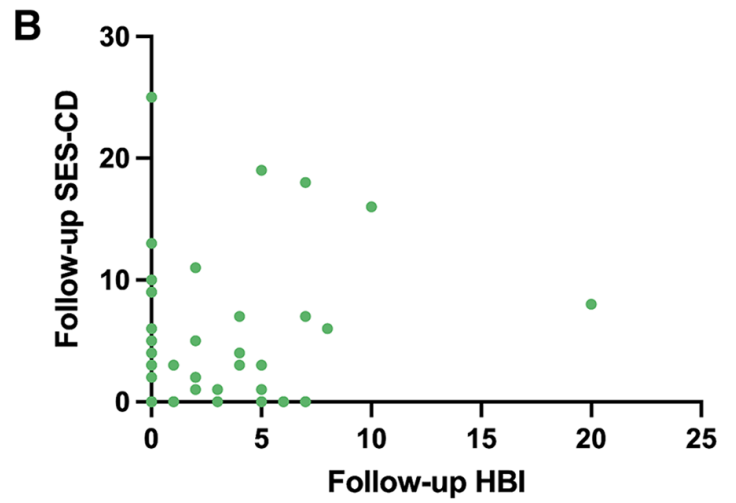

Supplement: flgastro-2022-102309supp002.pdf [file flgastro-2022-102309supp002.pdf]
